# Supplementary material for: Li dopant induces moisture sensitive phase degradation of an all-inorganic CsPbI2Br perovskite
Source: Royal Society of Chemistry journal article supplement (doi:10.1039/c8cc05444d), 2018-01-01
Supplement: c8cc05444d1.pdf [file c8cc05444d1.pdf]

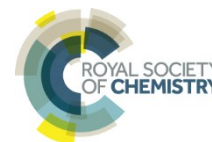

## Journal Name

### COMMUNICATION

## Li Dopant Inducing Moisture Sensitive Phase Degradation of All-inorganic CsPbI<sub>2</sub>Br Perovskite

Yihui Li,<sup>a</sup> Yong Wang,<sup>a</sup> Taiyang Zhang,<sup>a</sup> Sorachon Yoriya,<sup>b</sup> Pisist Kumnorkaew,<sup>b</sup> and Sujie Chen,<sup>c</sup> Xiaojun Guo,<sup>c</sup> Yixin Zhao\*<sup>a</sup>

### Supplementary Information

### Experiment Details

**Materials:** The CsI, PbI<sub>2</sub> and PbBr<sub>2</sub> were purchased from Alfa Aesar. The PMMA and DMF was purchased from Sigma-Aldrich. The HPbI<sub>3+x</sub> (x=0.1-0.2) were prepared by mixing PbI<sub>2</sub> and 57% w/w hydroiodic acid (molar ratio 1:1.4) in DMF and then stirring for 2h.<sup>35</sup> The excess HI was used to ensure the complete conversion of PbI<sub>2</sub> into HPbI<sub>3+x</sub>. The precipitates were recovered by evaporating the solutions at 70 °C. Finally, the resulting solid was centrifuged and washed four times with copious diethyl ether until supernatant turned to colorless. The collected powders were stored in oven at 50 °C.

**Device preparation:** The patterned TEC-15 FTO substrate was coated with a compact TiO<sub>2</sub> layer by spray pyrolysis using 0.2 M Ti(IV) bis (ethyl acetoacetate)-diisopropoxide in 1-butanol solution at 450 °C. The coated substrate was then annealed at 450 °C for one hour. The 0.5 M perovskite CsPbI<sub>2</sub>Br in N,N-Dimethylformamide (DMF) was prepared by mixing stoichiometric CsI, HPbI<sub>3+x</sub> and PbBr<sub>2</sub> with 2:1:1 molar ratio. Then the precursor solution was spun onto the c-TiO<sub>2</sub>/FTO substrate at 3000 rpm with accelerating rate of 3000 rpm/s for 30 s, following by annealing at 150 °C for 4 minutes to form inorganic perovskite film. The TiO<sub>2</sub> coated substrates were subject to preheating at 70 °C in order to increase the surface coverage of the inorganic perovskite. PMMA (10mg/ml, chlorobenzene) was spun onto the perovskite film to form PMMA layer. Then the annealed perovskite films was spin-coated with a HTM layer consisting 0.1 M Spiro-MeOTAD, 0.035 M bis(trifluoromethane) sulfonamide lithium salt (Li-TFSi) and 0.12 M 4-tert-butylpyridine (tBP) in chlorobenzene/acetonitrile (10:1, v/v) solution at 4000 rpm for 20 s. Referring to the other work for PTAA<sup>34</sup>, non-doping PTAA (10mg/ml in toluene) was spun onto the annealed perovskite. A 100-nm thick Ag layer was deposited by thermal evaporation.

**Moisture stability evaluation:** PMMA (10 mg/ml, chlorobenzene) was spun onto the perovskite film to form PMMA layer. The relative humidity level of the drybox was controlled by the entrance ratio of dry air in and moisture air. The a-CsPbI<sub>2</sub>Br films were kept in the corresponding box to study phase changes.

**Characterization:** The crystal structures of the perovskite films were measured by X-ray diffraction (XRD, Shimadzu XRD-6100 diffractometer with Cu K $\alpha$  radiation). The absorption spectra of the perovskite films were characterized by a Cary-60 UV-vis spectrophotometer. The morphologies of the perovskite films were characterized using SEM (JEOL JSM-7800F Prime). The photocurrent-voltage (J-V) characteristic of perovskite solar cells was measured with a Keithley 2401 source meter with a scan rate of 0.05 V/s under simulated AM 1.5G illumination using Enlitech's 3A light source.

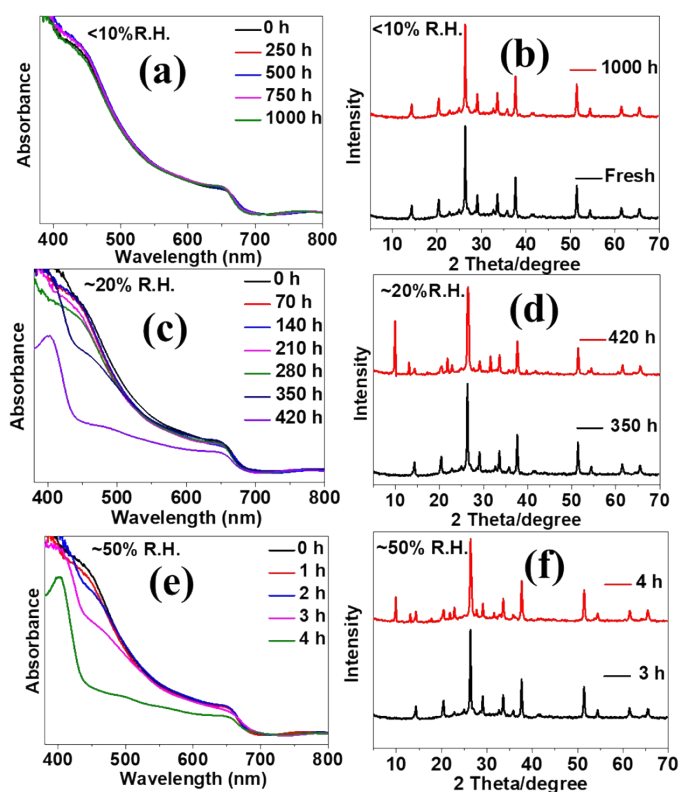

Fig. S1 (a, c, e) Evolution of UV-vis absorption and (b, d, f) XRD patterns of  $\alpha$ -CsPbI<sub>2</sub>Br films exposed to different R.H. of <10%, ~20%, ~50% and different exposure times.

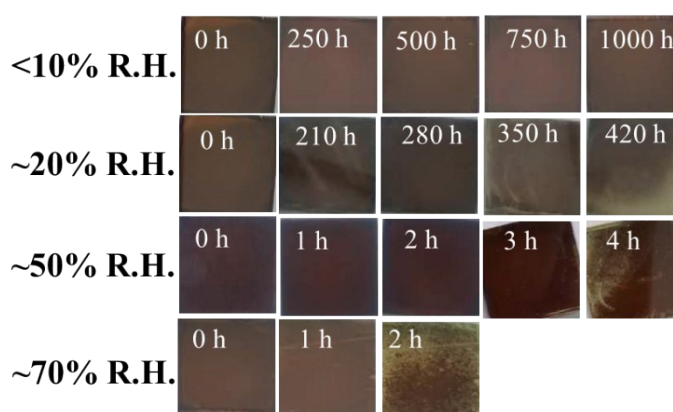

Fig. S2 Variation of color of the  $\alpha$ -CsPbI<sub>2</sub>Br films exposed to different R.H. of <10%, ~20%, ~50%, and ~70%.

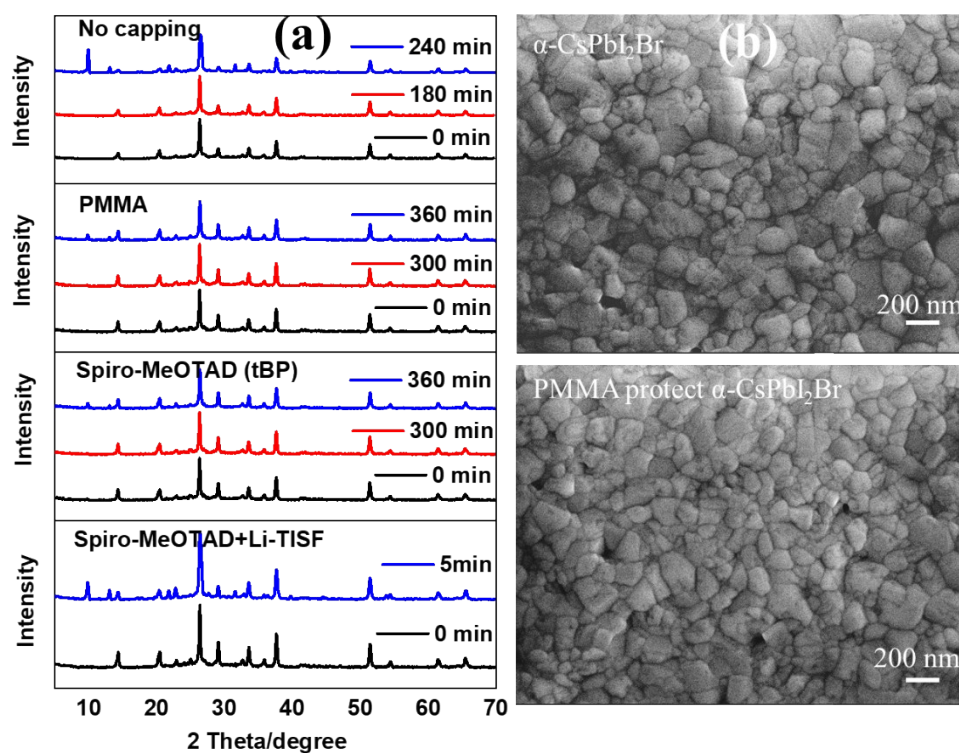

Fig. S3 (a) XRD patterns of CsPbI<sub>2</sub>Br films with and without PMMA, Spiro-MeOTAD (tBP), and Spiro-MeOTAD+Li-TISF capping. (b) SEM images of  $\alpha$ -CsPbI<sub>2</sub>Br films (top) without PMMA capping and (bottom) with PMMA capping.

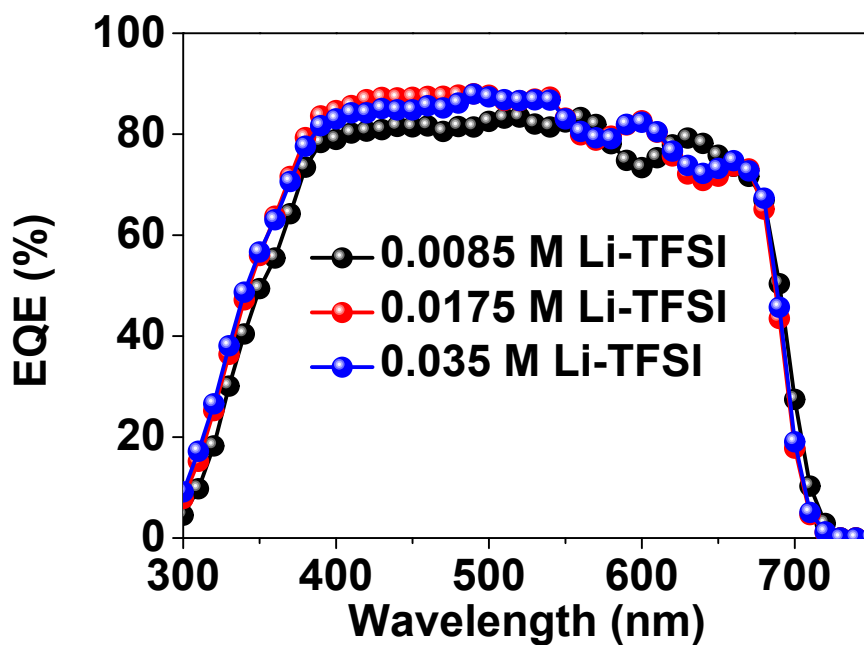

Fig. S4 IPCE of CsPbI<sub>2</sub>Br PSCs based on Spiro-MeOTAD with 0.0085 M Li-TFSI, 0.0175 M Li-TFSI, and 0.035 M Li-TFSI doping.

Table S1. Photovoltaic parameters of CsPbI<sub>2</sub>Br PSCs based on Spiro-MeOTAD with 0.0085 M Li-TFSI, 0.0175 M Li-TFSI, and 0.035 M Li-TFSI doping. The data were averaged from 32 devices.

|         | <b><i>J</i><sub>sc</sub> (mA·cm<sup>-2</sup>)</b> | <b><i>V</i><sub>oc</sub> (V)</b> | <b>FF</b>   | <b>PCE (%)</b> |
|---------|---------------------------------------------------|----------------------------------|-------------|----------------|
| 0.0085M | 15.56 ± 0.13                                      | 1.04 ± 0.015                     | 53 ± 3      | 8.57 ± 0.59    |
| 0.0175M | 15.67 ± 0.1                                       | 1.044 ± 0.01                     | 62.9 ± 1.8  | 10.3 ± 0.4     |
| 0.035M  | 15.7 ± 0.09                                       | 1.06 ± 0.01                      | 72.35 ± 2.2 | 12.04 ± 0.37   |
